# 2-photon-fabricated nano-fluidic traps for extended detection of single macromolecules and colloids in solution

Oliver Vanderpoorten<sup>1,2,3,4,+</sup>, Ali Nawaz Babar<sup>1,3+</sup>, Georg Krainer<sup>1,+</sup>, Raphaël P.B. Jacquat<sup>1,+</sup>, Pavan K. Challa<sup>1</sup>, Quentin Peter<sup>1</sup>, Zenon Toprakcioglu<sup>1</sup>, Catherine K. Xu<sup>1</sup>, Ulrich F. Keyser<sup>3</sup>, Jeremy Baumberg<sup>3</sup>, Clemens F. Kaminski<sup>2</sup>, and Tuomas P. J. Knowles<sup>1,3\*</sup>

<sup>1</sup>Yusuf Hamied Department of Chemistry, University of Cambridge, Lensfield Road, Cambridge, CB2 1EW, UK

<sup>2</sup>Department of Chemical Engineering and Biotechnology, University of Cambridge, Philippa Fawcett Drive, Cambridge, CB3 0AS, UK

<sup>3</sup>Cavendish Laboratory, Department of Physics, University of Cambridge, J. J. Thomson Avenue, Cambridge, CB30HE, UK

<sup>4</sup>Department of Physics and Technology, UiT The Arctic University of Norway, Tromsø, Norway

\*To whom correspondence should be addressed: [tpjk2@cam.ac.uk](mailto:tpjk2@cam.ac.uk)

<sup>+</sup>These authors contributed equally to this work.

21 **Abstract**

22

23 The analysis of nanoscopic species, such as proteins and colloidal assemblies, at the single-molecule level has  
24 become vital in many areas of fundamental and applied research. Approaches to increase the detection timescales  
25 for single molecules in solution without immobilising them onto a substrate surface and applying external fields  
26 are much sought after. Here we present an easy-to-implement and versatile nanofluidics-based approach that  
27 enables increased observational-timescale analysis of single biomacromolecules and nanoscale colloids in  
28 solution. We use two-photon-based hybrid lithography in conjunction with soft lithography to fabricate nanofluidic  
29 devices with nano-trapping geometries down to 100 nm in height. We provide a rigorous description and  
30 characterisation of the fabrication route that enables the writing of nanoscopic 3D structures directly in photoresist  
31 and allows for the integration of nano-trapping and nano-channel geometries within micro-channel devices. Using  
32 confocal fluorescence burst detection, we validated the functionality of particle confinement in our nano-trap  
33 geometries through measurement of particle residence times. All species under study, including nanoscale colloids,  
34  $\alpha$ -synuclein oligomers, and double-stranded DNA, showed a three to five-fold increase in average residence time  
35 in the detection volume of nano-traps, due to the additional local steric confinement, in comparison to free space  
36 diffusion in a nearby micro-channel. Our approach thus opens-up the possibility for single-molecule studies at  
37 prolonged observational timescales to analyse and detect nanoparticles and protein assemblies in solution without  
38 the need for surface immobilisation.

## 39 Introduction

40  
41 The spatial confinement of biomolecules or colloidal nanoparticles in solution for biophysical studies at the single-  
42 molecule level has become instrumental in many areas of fundamental and applied research including  
43 nanobiotechnology [1], biophysics [2], and clinical diagnostics [3]. It allows for increased observational-timescale  
44 analysis of nanoscopic species such as nucleic acids, protein assemblies [4] or colloidal particles [5] with single-  
45 molecule sensitivity [6]. Currently, molecular confinement is most typically achieved through surface  
46 immobilisation of the biomolecule or nanoparticle of interest on a substrate surface (e.g., for confocal or total  
47 internal reflection fluorescence (TIRF) microscopy) [7],[8],[9]. This approach, however, has numerous drawbacks,  
48 not least because surface interactions can change the molecule's configuration and function.

49  
50 An alternative to surface immobilisation is the trapping of particles in solution without immobilising them onto a  
51 substrate surface. Various approaches using external fields, such as electric [10], hydrodynamic [11] and optical  
52 fields [12], [13], for nanoparticle trapping in solution have emerged. Optical trapping, for example, has proven  
53 effective in measuring repulsive or attractive forces between particles such as colloids and proteins, but the high  
54 laser powers required induce flows around the trapped particles leading to undesirable and confounding effects  
55 [1]. Furthermore, such techniques suffer from low throughput and require a refractive index mismatch between  
56 the particle and its surrounding media [14], which is often not the case when monitoring biological specimens.  
57 Other techniques, such as thermal trapping [15]–[17], have also shown to be effective at confining nanoparticles  
58 in small volumes, but similar to optical trapping, thermal particle trapping has significant drawbacks due to the  
59 sample undergoing motion because of convection. This puts limitations on the estimation of particle properties  
60 such as molecular size and particle reaction kinetics at physiologically relevant conditions.

61  
62 Recently, geometry-induced electrostatic trapping and colloidal trapping based on the spatial modulation of  
63 configurational entropy was demonstrated [18],[19]. This approach enables trapping without applying external  
64 fields and has proven invaluable in observing particles in an all aqueous environment [20]. Mojarad et al. [21]  
65 demonstrated trapping of colloids and gold nanoparticles in nanofluidic silica devices, which allowed  
66 measurement of their particle size and charge in silica-based nano-wells. Ruggeri et al. [22],[23] further pushed  
67 the limits of nano-trapping-based electrometry to the single-molecule level. While efficient in their use, however,  
68 to date, the fabrication of such trapping devices and their subsequent integration with microfluidic device platforms  
69 is challenging and demands specialised clean room equipment such as electron beam lithography (EBL) [24] and  
70 reactive ion etching (RIE) [25]. Even though such approaches generate nano-slits or nano-channels smaller than  
71 100 nm [26], the complexity of the fabrication process, writing times, and the costs to produce a single device  
72 render these techniques highly inefficient and impractical. Additionally, most of these techniques are relatively  
73 low throughput and integrating them with micro-channels, which is required for the chip-to-world interface, can  
74 be challenging.

75  
76 An alternative approach for fabricating nano-traps/nano-channels and integrating the nanostructures within a  
77 microfluidic chip platform involves the combination of conventional UV lithography followed by two-photon  
78 lithography (2PL) [27],[28], where a focused femto-second pulsed laser is scanned across the photoresist, resulting  
79 in the writing of device features below 200 nm in lateral size. 2PL or direct laser writing (DLW) is a powerful  
80 emerging technology and has gained much attention in the last years for the fabrication of 3-dimensional (3D)  
81 micro- and nano-structures and functional devices below the diffraction limit [29]. Fabrication of arbitrary 3D  
82 structures is possible in a photoresist from computer-generated 3D models and thus constitutes a fast and  
83 straightforward fabrication procedure [30]. Previously, microfluidic [31], nanofluidic [32], and optofluidic [33]  
84 devices were fabricated using femto-second laser 3D micromachining and were shown to allow for the integration  
85 of functionalities unachievable with conventional UV-lithography in device designs.

86  
87 Here, we demonstrate the facile fabrication of nanofluidic trapping devices using a 2PL system for increased  
88 observational-timescale single-molecule studies of biomacromolecules and colloids in solution. To this end, we  
89 developed an approach based on hybrid 2PL- and UV-lithography in conjunction with soft lithography [34] to  
90 generate nanoscale channels and adjacent nanoscale trap structures with dimensions down to 100 nm in height in  
91 a single step from a silicon master wafer. This allowed for the fabrication and prototyping of nanofluidic

92 polydimethylsiloxane (PDMS)–silica devices in a facile and scalable manner and the writing of various nano-  
93 trapping geometry designs with varying heights in one writing process. We analysed the master wafer and PDMS  
94 imprints using correlative scanning electron microscope (SEM) and atomic force microscope (AFM)  
95 characterisation techniques and validated the functionality of particle confinement in nano-trap geometries through  
96 measurement of particle residence times in nano-traps as compared to micro-channels and nano-channels using  
97 single-molecule fluorescence burst analysis. We found that all species analysed, including nanoscale colloids,  
98 protein oligomers, and short DNA duplexes, showed a three- to five-fold increase in average residence time in the  
99 detection volume of nano-traps in comparison to free space diffusion in a nearby nano- or micro-channel. We  
100 further demonstrate other fluorescence microscopy techniques (confocal imaging and TIRF microscopy) as  
101 alternative readout techniques to be used in combination with nanofluidic traps. Taken together, our developments  
102 presented herein constitute a cost-effective and easy-to-implement approach for the fabrication of nanofluidic trap  
103 devices and open-up a broad avenue of possibilities to study single molecules in solution for extended periods of  
104 time without permanent surface immobilization and without applying external fields.

## 105 Results and Discussion

### 106 Integration of nano-trapping and nano-channel geometries between micro-channels with 2-photon 107 lithography

108 Conventional fabrication of trapping devices relies on sophisticated clean-room equipment [18] and does not allow  
109 high throughput and flexibility in the writing of structures of varying geometry and height. To overcome these  
110 challenges and make the fabrication process more facile, we propose here a fabrication route of nanofluidic devices  
111 via hybrid 2PL that enables the writing of nanoscopic 3D structures directly in photoresist [28]. By combining  
112 large area UV mask lithography with local high precision two-photon laser writing, we demonstrate the integration  
113 of nano-traps written adjacent to nano-channels in a pre-existing microfluidic device design (see **Figure 1**). Since  
114 2PL is a dosage-dependent process and the smallest feature size obtained in the photoresist depends on the laser  
115 intensity and exposure time, we first set out to first optimise the fabrication procedure to achieve full merging of  
116 nano-trap and nano-channel geometries.

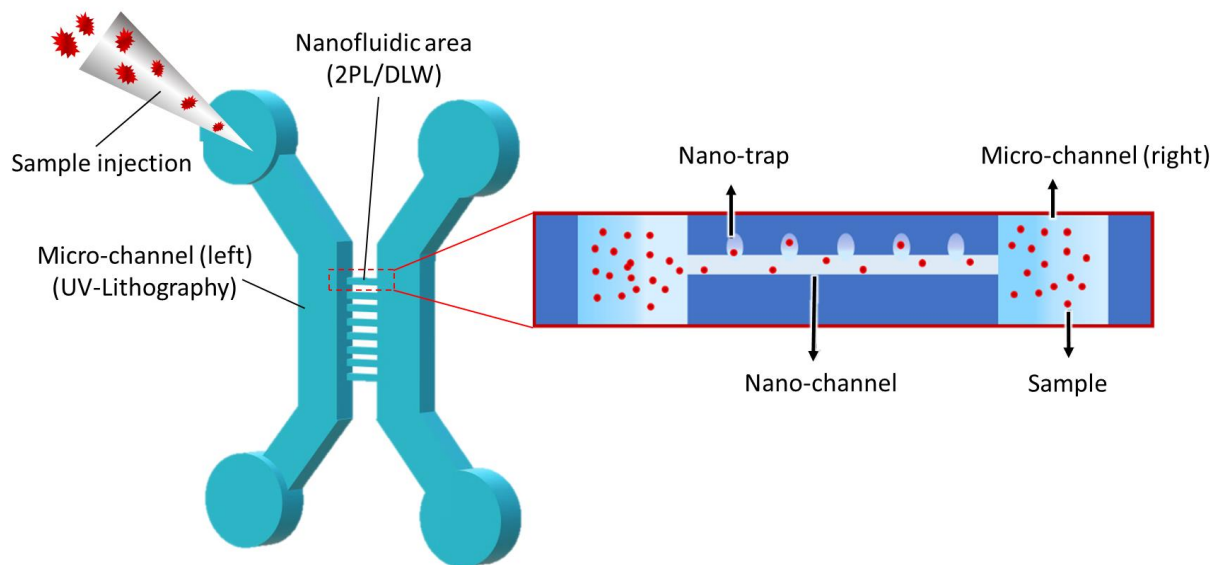

121 **Figure 1. Design and fabrication of nanofluidic device with trapping functionalities.** Schematic of the device design  
122 consisting of microfluidic reservoirs, inlets/outlets, nanofluidic channels and nano-trapping arrays. 2-photon lithography  
123 (2PL) (or direct laser writing, DLW) is used to combine microfluidics with nanofluidic functionalities. Large area mask-based  
124 UV lithography patterns microfluidic areas, whereas 2PL incorporates nano-channels and nano-traps in between two micro-  
125 channels. The inset illustrates the placement of the nano-traps next to the nanofluidic channel.

128 We began by exploring and prototyping nanofluidic geometries in negative SU-8 photoresist (**Figure 2**) and  
129 produced imprints into PDMS following standard UV- and soft-lithography protocols (**Figure 3**). Characterization  
130 techniques such as SEM and AFM were used to analyse the prototype nanostructures. Varying the laser power,  
131 laser writing speed, and the distance in between the nano-traps and nano-channel (Y-offset) during the 2PL writing  
132 process resulted in different configurations of nano-trap moulds as shown in **Figure 2 (A–E)**. Straight nano-  
133 channels were written at a fixed laser intensity of 90 mW and a writing speed of 100  $\mu\text{m/s}$ . Dots for nano-trap  
134 moulds were written adjacently with 1000  $\mu\text{m/s}$  scanning speed and by modulating the laser at 100 mW. Nano-  
135 traps were added every 3  $\mu\text{m}$  along the nano-channels. The height of the nano-traps was smaller than the nano-  
136 channels due to the lower net exposure of the photoresist. Notably, the 3D piezo-flexure stage used for scanning  
137 of the laser beam is a key component and allowed for varying the Y-offset between nano-traps and nano-channels  
138 with a resolution down to 10 nm by leveraging the closed-loop control mode of a piezo stage. Accordingly, the Y-  
139 offset was varied from 1.25  $\mu\text{m}$  to 0.85  $\mu\text{m}$  in steps of 100 nm. As shown in **Figure 2 (B)**, at a Y-offset of 1.15  
140  $\mu\text{m}$ , the SU-8 of the nano-trap geometry merged with the nano-channel through monomer cross-linking. The same  
141 geometries were also analysed in the PDMS imprints as shown in SEM micrographs of **Figure 3 (A–E)**. Notably,  
142 by just varying the Y-offset between the nano-channel and nano-traps, different geometries and designs of the  
143 nano-traps in PDMS could be generated, for example, triangular nano-traps as shown in **Figure 3 (B)**. This  
144 highlights the importance of precise laser positioning to control not only the merging of nano-channels with nano-  
145 traps, but also the possibility to create traps with varying geometries. The process of 2PL for writing almost  
146 arbitrary 3D structures thus allows significant flexibility here for choosing and modulating the desired geometry,  
147 microfluidic chip design, and introducing multiple geometry layers within a single spin-coating process. Indeed,  
148 we were able to add other conformations of traps to a nano-channel, for example, where the traps were positioned  
149 on top of the nano-channels (**Figure 3 (G)**) or nano-traps with bottle-neck openings (**Figure 3 (H)**) on the side.  
150 The latter structures exhibited a nano-trap height of 100 nm, as confirmed by correlative SEM/AFM measurements  
151 on the master wafer (**Supplementary Figure 1**).

152

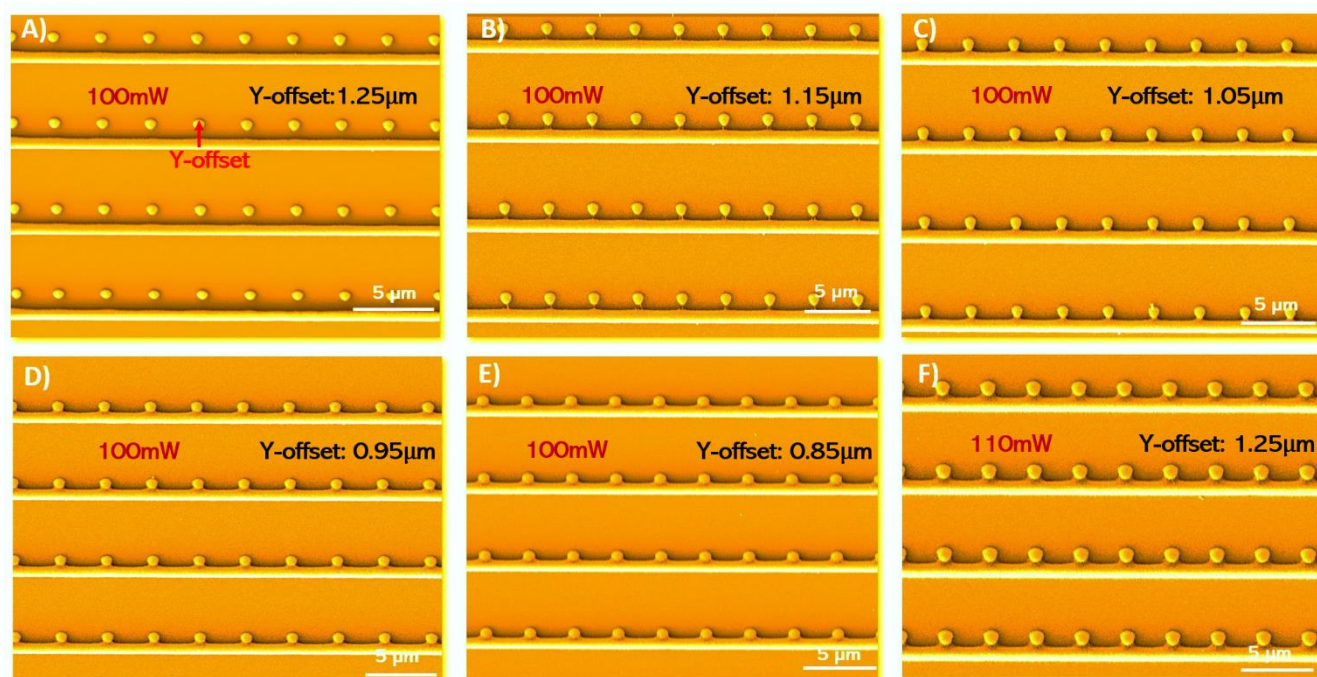

153

154

**Figure 2. Prototypes of nano-channel and nano-trap geometries fabricated in photoresist using 2-photon lithography.** Shown are SEM micrographs of nano-channel/nano-trap moulds as obtained by 2-photon lithography in SU-8 photoresist using varying laser powers and Y-offsets. The writing speeds for the nano-traps and nano-channels were 1000  $\mu\text{m/s}$  and 100  $\mu\text{m/s}$ , respectively. **(A)–(E)** Nano-channel/nano-trap moulds obtained with a Y-offset in the range of 1.25–0.85  $\mu\text{m}$ ; the laser power for writing nano-channels and nano-traps was 90 mW and 100 mW, respectively. **(F)** Optimized nano-channel/nano-trap mould written with a Y-offset of 1.25  $\mu\text{m}$ ; the laser power for writing nano-channels and nano-traps was 100 mW and 110 mW, respectively.

160

161



162 The prototyping geometries obtained thus far were used to determine appropriate and optimised writing parameters  
163 for creating nanofluidic trapping devices required for nanoparticle and biomolecule trapping in single-molecule  
164 experiments (see below). For this chip design, we required round nano-trapping cavities of a few hundred  
165 nanometres in radius which are well-merged with straight nano-channels that have dimensions in the submicron-  
166 regime. Such geometrical features could be obtained by using 110 mW laser power for writing of the traps,  
167 100 mW for the nano-channels and a Y-offset in between them of 1.25  $\mu\text{m}$  (**Figure 2 (F)**). Thereby, we fabricated  
168 nano-traps of 350 nm in radius adjacent to nano-channels of 650 nm in width. The chosen fabrication parameters  
169 show geometrical consistency between individual traps and are still mechanically stable enough to have the same  
170 structures in the final bonded device. The mechanical stability of the nano-trap structures in SU-8 was further  
171 enhanced by increasing the cross-linking density of monomers with a second UV exposure after writing  
172 nanostructures with 2PL [35].  
173

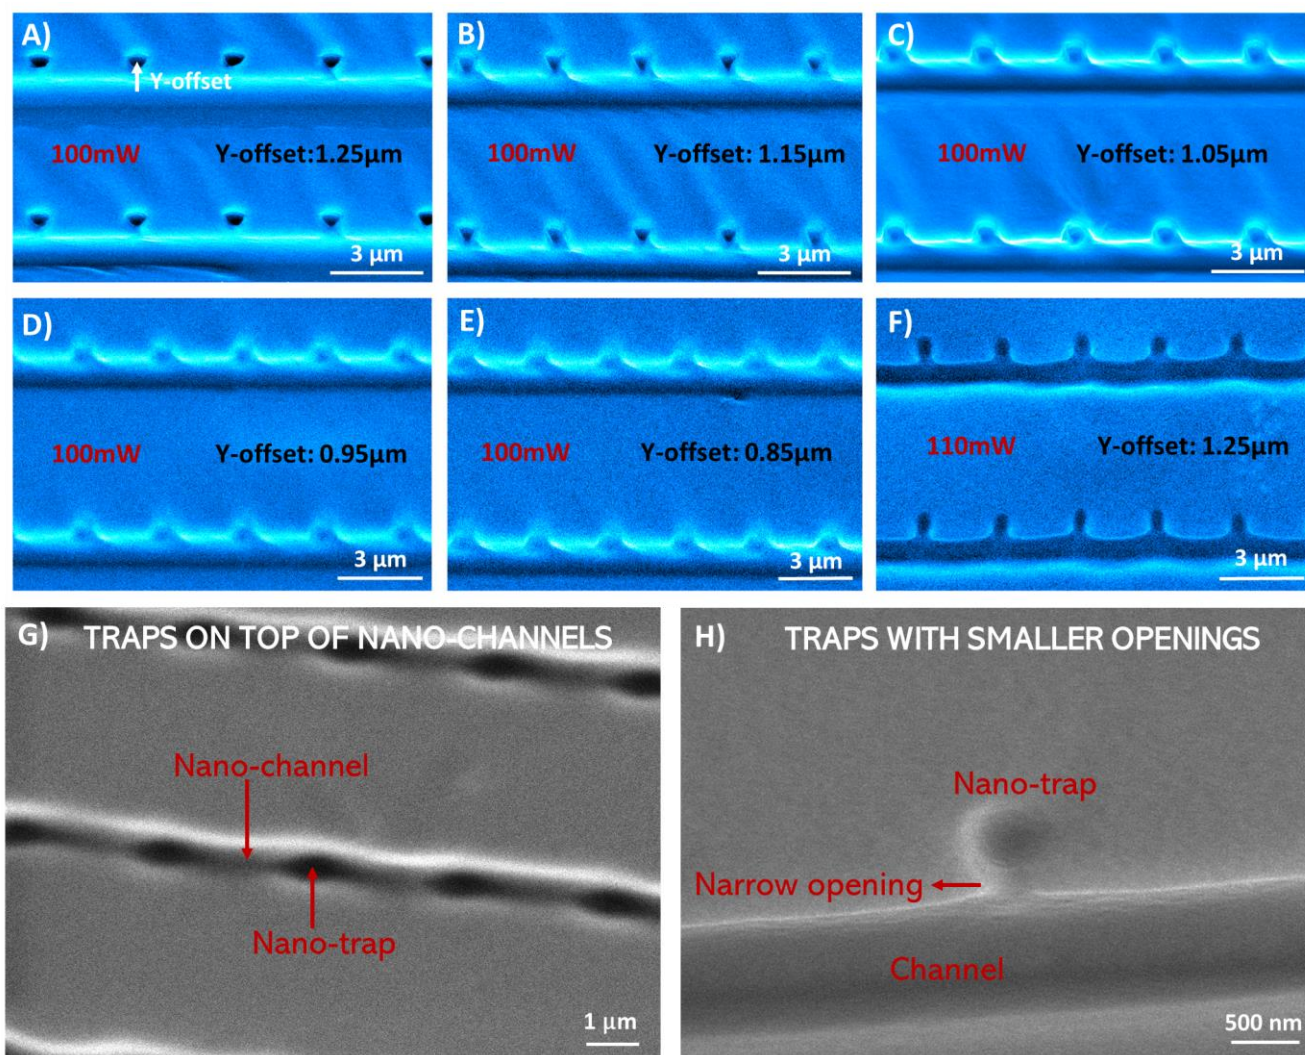

174  
175 **Figure 3. PDMS imprints of nano-channel and nano-trap device prototypes.** Shown are SEM micrographs for nano-  
176 channels and nano-traps imprinted in PDMS. The moulds, from which the PDMS imprints were fabricated, were written in  
177 SU-8 photoresist with 2PL by varying the laser power and Y-offset (Figure 2). The writing speeds for the nano-traps and  
178 nano-channels were 1000  $\mu\text{m}/\text{s}$  and 100  $\mu\text{m}/\text{s}$ , respectively. (A)–(E) Nano-channels and nano-traps imprinted in PDMS with  
179 Y-offset in the range from of 1.25  $\mu\text{m}$ –0.85  $\mu\text{m}$ ; the laser power for nano-channels and nano-traps were 90 mW and 100 mW,  
180 respectively. (F) Optimized nano-channel/nano-traps imprinted in PDMS with Y-offset of 1.25  $\mu\text{m}$ ; the laser power for nano-  
181 channels and nano-traps were 100 mW and 110 mW, respectively. (G) SEM image of a trapping device with nano-traps on  
182 top of nano-channels in the PDMS (top view). (H) SEM image of the narrow opening of a nano-trap imprinted in PDMS.  
183 Correlative AFM imaging showed a height of approx. 100 nm of the pockets (**Supplementary Figure 1**).  
184

## Integration of nano-channel and nano-trap geometries in a microfluidic device platform

After having optimised the procedures for generating nano-trap and nano-channel geometries via our 2PL approach, we set out to fabricate the combined nanofluidic device for single-molecule experiments, as shown in **Figure 1**. The device was produced by first generating the micron-scale structures of the chip, which consisted of two microfluidic channels and reservoirs, sample inlets/outlets and pre-filters. This was done by transferring these chip features from a high-resolution transparency acetate photomask onto SU-8 photoresist, spin-coated on a silicon wafer, via conventional contact UV lithography [30]. In a second step, the microfluidic channel reservoirs, separated by 75  $\mu\text{m}$ , were connected with straight nano-channels and adjacent nano-traps using the optimised 2PL writing parameters, as detailed above (c.f., **Figure 2 (F)** and **Figure 3 (F)**). Subsequently, PDMS imprints and glass-bonded chips were produced from these structures using standard soft lithography and replica moulding procedures. **Figure 4 (A)** shows a SEM micrograph of the final PDMS imprint with an overview of the conventional micron-scale chip functionalities. Further magnification (**Figure 4 (B)–(D)**) shows the successful integration of nanofluidic functionalities in between the microfluidic reservoirs. Two microfluidic compartments of 25  $\mu\text{m}$  depth were joined by 2PL with six nanofluidic areas (**Figure 4 (B)**, indicated with arrows). **Figure 4 (C)** shows in greater detail one nano-trapping array consisting of 18 nano-channels with adjacently added nano-traps every 3  $\mu\text{m}$ . Notably, the channels show a wider funnel-like shape at the microfluidic interface due to the sequential double exposure of the photoresist by UV-lithography and 2PL. The central part of the array, however, shows the intended trap geometry from the prototypic procedure above, with suitable traps for confinement of nanoparticles imprinted in PDMS. The nano-channels were 650 nm wide and connected to the nano-traps, which had a radius of 350 nm. The nano-channels and nano-traps were 750 nm and 650 nm in height, respectively, according to correlative profilometer measurements (**Supplementary Figure 2**).

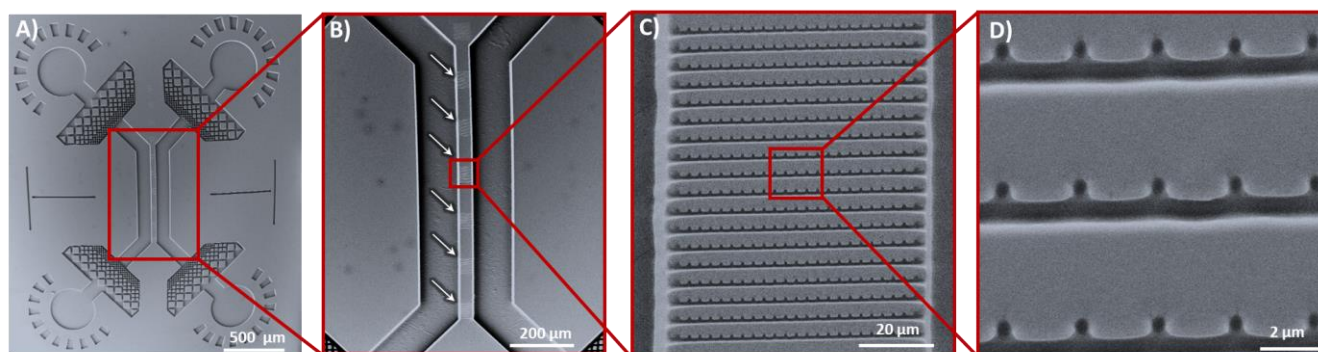

**Figure 4. Nanofluidic device with trapping functionalities for single-molecule experiments.** Shown are SEM micrographs of PDMS nanofluidic device imprints fabricated via hybrid UV mask lithography and 2PL. **(A)** Full view of the micro-/nanofluidic device, consisting of microfluidic reservoirs, inlets/outlets, nanofluidic channels and nano-trapping arrays. The design corresponds to the schematic shown in Figure 1. **(B)** Magnification depicting the arrays of 75  $\mu\text{m}$  long nano-channels with integrated nano-traps in between the two 25  $\mu\text{m}$  deep micro-channels in PDMS. **(C)** Higher magnification of nanofluidic channels and nano-traps shows consistent imprinting of nano-trapping arrays in PDMS. **(D)** Zoom-in of SEM micrograph showing the geometry of nano-traps.

## Single-molecule fluorescence detection of colloids and biomolecules in nano-traps

Single-molecule studies for biological measurements in miniaturised devices have proven very useful due to their precise sample handling, small volume manipulation, and high throughput capabilities [36], [37]. Prolonged observation of single molecules or nano-colloids in solution is still a challenging task but an important step towards microfluidic total-analysis systems ( $\mu\text{TAS}$ ). [38] Our chip design provides an opportunity for prolonged detection of single particles in solution without permanent surface immobilization. We intend to increase particle residence times in a detection volume due to the additional local steric confinement in the nano-traps.

To demonstrate this, we set out confocal-based single-molecule burst experiments that allowed us to observe, record, and compare the events of single particles entering and leaving the nano-trapping geometry. **Figure 5** schematically illustrates the experimental setup. The device's micro-channel reservoirs were filled with respective



229 particle solutions at pico- to nano-molar concentrations. Once the sample in the device reached equilibrium and  
230 the nanoparticles started diffusing through the nano-channels, fluorescence burst detection was conducted within  
231 the nano-traps. Samples were excited with a continuous 488-nm diode laser and their fluorescence collected using  
232 avalanche photodiodes, which allowed readout of the fluorescent nanoparticle signal with high temporal  
233 resolution.

234

235 We first performed measurements on 40 nm fluorescent particles and compared burst detection under nano-trap  
236 confinement to residence times in the microfluidic reservoirs of the device and the nano-channel bridges. To this  
237 end, the confocal detection volume was placed in the respective region of the device, as illustrated in **Figure 5**  
238 **(A)–(C)**. Within the microfluidic part of the device (**Figure 5 (A)**), multiple fluorescence burst signals are  
239 overlapping during the measurement and show various intensity levels, due to multiple particles being able to cross  
240 through the detection volume at the same time. The time regime of transition events is in the millisecond range. In  
241 a second measurement, the laser spot was placed inside a nano-channel, as shown in **Figure 5 (B)**, and confocal  
242 time traces were recorded. The number of fluorescence bursts was drastically reduced due to the single-molecule  
243 exclusion capabilities of the nano-channel, and just slightly increased detection times in comparison to  
244 measurements in the microfluidic channel were observed. Finally, we placed the confocal spot at the centre of a  
245 nano-trap. Nanoparticles in a single nano-trap geometry were recorded as shown in **Figure 5 (C)**. The time trace  
246 shown exemplifies the prolonged nature of fluorescence burst signals obtained within a nano-trap and is common  
247 amongst all species under study (**Supplementary Figure 3**).

248

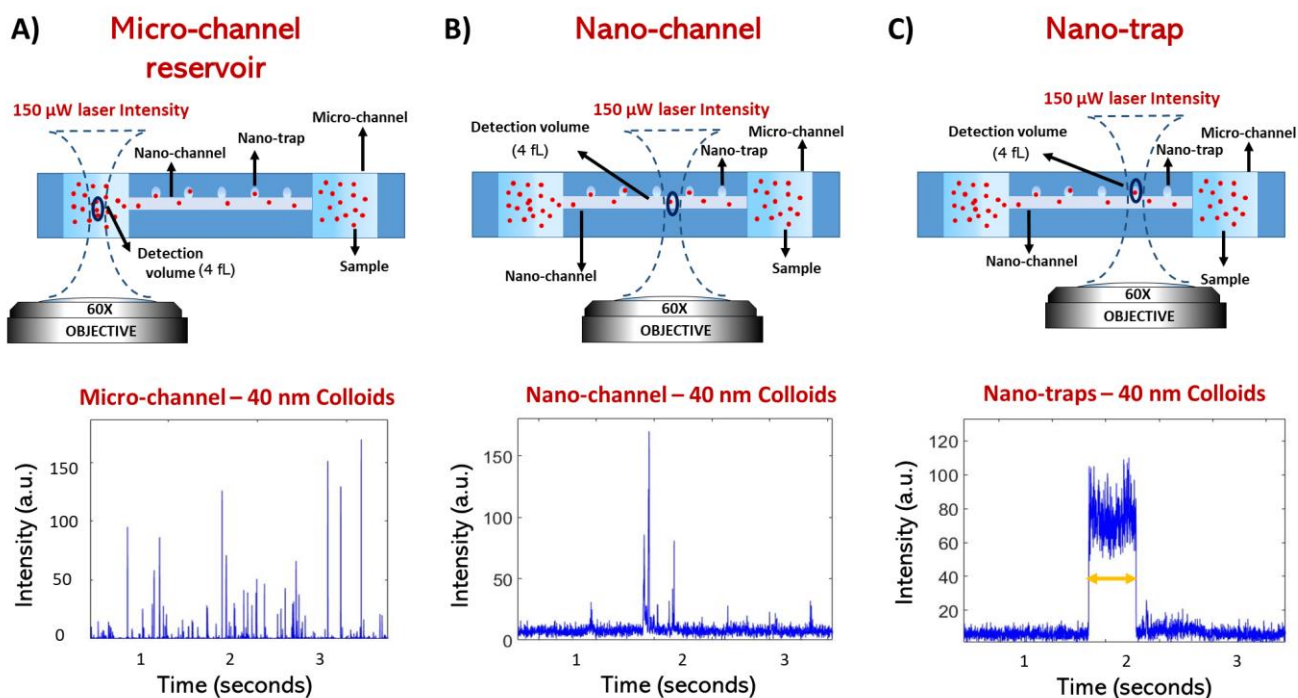

249

250

251 **Figure 5. Single-molecule fluorescence detection in microfluidic reservoirs, nano-channels regions and under nano-**  
252 **trap confinement.** (A) The confocal detection volume was placed into the microfluidic part of the device at the mid height  
253 of the channel (i.e., 13  $\mu$ m above the glass cover slip). The diffusion of multiple particles at the same time through the confocal  
254 spot results in multiple fluorescence bursts as shown in the fluorescence burst time trace. (B) The confocal fluorescence burst  
255 detection volume was placed in the nano-channel region. Fluorescence data recorded in the nano-channel shows more rare  
256 events of fluorescent bursts, which implies that the probability of multiples particles crossing the detection volume is lowered  
257 by the nano-channel confinement. (C) The detection volume was placed into the centre of a nano-trap geometry. The  
258 fluorescence time trace data shows significantly increased residence time of single particles up to ten to hundreds of  
259 milliseconds under nano-trap confinement.

259

260 Using the same nanofluidic geometry, we compared the behaviour of differently sized particles in the nano-traps.  
261 We performed experiments, as described before, with a series of nano-colloids and biomacromolecules, including



262 100 nm colloids, 40 nm colloids,  $\alpha$ -synuclein oligomers (~9–14 nm), and 45 bp DNA (~15.3 nm length, estimated  
263 with 0.34 nm per bp, rod-like) [40][41] in deionized water. Our results show that the nano-traps increase the  
264 residence time of particles within the detection volume due to the additional local steric confinement. **Figure 6**  
265 shows a comparison of their mean residence times inside the nano-traps in relation to microfluidic channels. The  
266 time spent by the particle inside the laser spot depends on its diffusional properties and therefore on its size. In  
267 general, according to the Stokes-Einstein relation, the diffusion coefficient is defined as  $D = (k_B T) / (6\pi\eta R_H)$ , where  
268  $R_H$  is the hydrodynamic radius,  $k_B$  the Boltzmann constant,  $T$  the temperature and  $\eta$  the viscosity. This trend can  
269 be observed for confined and non-confined particles. Strikingly, comparing the nano-trap residence time to the  
270 microfluidic channel indicates an up to 5-fold increase of observation time within the confocal detection volume.  
271 This is expected because the walls limit the possibility of the molecule escaping from the laser's field of view, as  
272 mentioned above. The Debye length can be assumed to be less than 100 nm [39] and should not be the major factor  
273 in the confinement presented here, but definitely needs to be considered when using smaller nanofluidic design  
274 dimensions instead. Enhancement of the residence time, once the particle is in the nano-trap, thus enables longer  
275 signal capture of a single particle. This opens-up the possibility for single-molecule metrology of biomolecules  
276 and colloids in solution over extended periods of time.

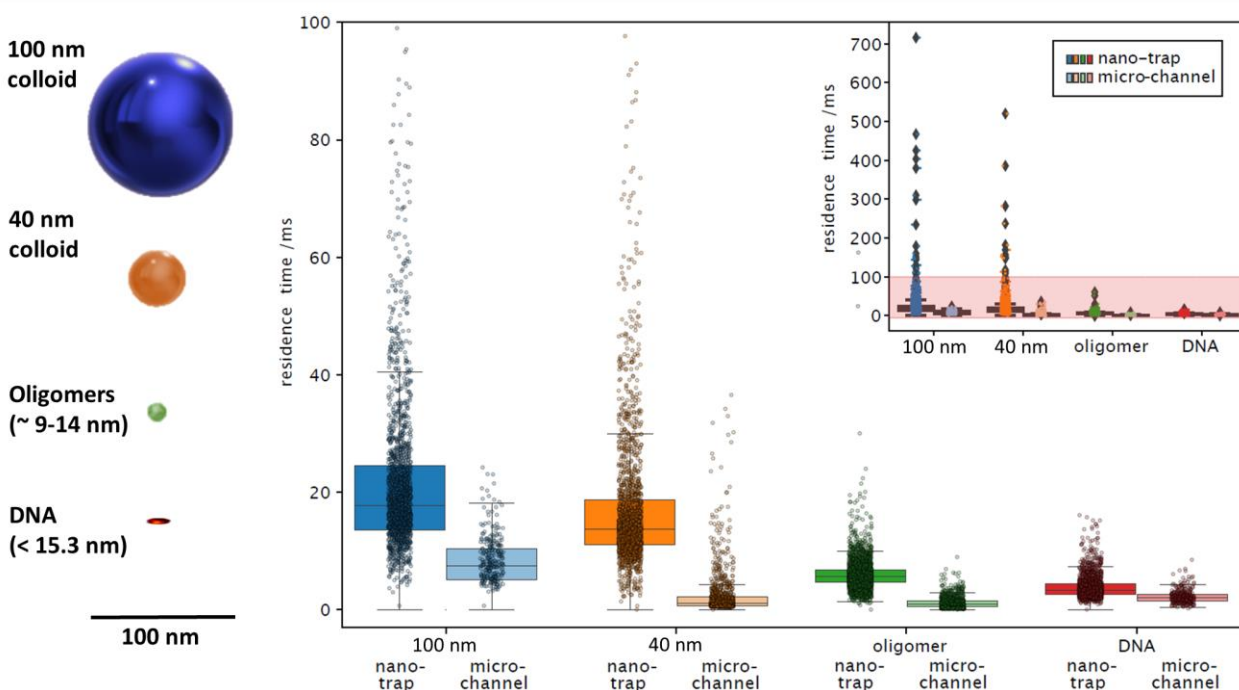

277  
278

279 **Figure 6. Residence time of specimen under nano-trap confinement.** (A) Schematic illustration of the relative size  
280 difference of specimen probed. (B) Comparison between residence times for 100 nm colloids, 40 nm colloids,  $\alpha$ -synuclein  
281 oligomers, and 45 bp DNA in micro-channel reservoirs and nano-trapping geometries. Residence time in nano-traps relative  
282 to the detection time in micro-channel reservoirs is increased by a factor of approximately 3- to 5-fold. The insert shows the  
283 existence of rare trapping events in the hundreds of millisecond range for colloidal particles, and up to tens of millisecond for  
284 oligomers and DNA.

285

## 286 Conclusions

287

288 In this paper, we have demonstrated the use of hybrid 2PL for the fabrication of nano-traps written adjacent to  
289 nanofluidic and microfluidic channels and their usage for the study of colloidal nanoparticles and  
290 biomacromolecules at the single-molecule level. We have established conditions for the successful generation of  
291 a silicon master wafer with nanoconfinement geometries in a negative SU-8 photoresist by combining 2-photon  
292 direct laser writing with UV lithography. We imprinted nanofluidic devices from the silicon master wafer into  
293 PDMS to make functional nano-channels with adjacent nano-traps of 350 nm radius and 650 nm height, but also  
294 much smaller geometries, and structures below 100 nm in height, are possible (**Supplementary Figure 1**). Given  
295 the ease of fabrication, our approach can be readily adopted by laboratories with access to commercial or custom-

296 built 2PL systems and allows for the fabrication and prototyping in a high-throughput and scalable manner as  
297 opposed to EBL and sequential clean room nanofabrication techniques.

298

299 To demonstrate the applicability of the nano-trapping devices developed herein for prolonged observation of single  
300 molecules, we used single-particle fluorescence burst detection to measure the residence time of polymer  
301 nanoparticles such as 100 nm and 40 nm colloids, and various biological relevant samples like  $\alpha$ -synuclein  
302 oligomers and fluorescently labelled 45 bp DNA in nanofluidic confinement. Although our nano-trap geometry is  
303 orders of magnitude larger in comparison to the biological specimen under study, we observed a significant  
304 increase in residence times of the samples. All species analysed in the same trapping geometry showed up to 3- or  
305 5-fold increase of observation time in a diffraction limited confocal detection volume. This finding is significant,  
306 as it opens-up the possibility to study and analyse biomacromolecules or biomolecular assemblies in solution  
307 without permanent surface immobilization for extended periods of time. It also allows longer observation of the  
308 same molecule for optical techniques that greatly benefit from higher photon counts such as FRET measurements  
309 at the single-molecule level.

310

311 Readout is not limited to single-particle fluorescence burst detection. As proof of concept, we also explored other  
312 fluorescence microscopy techniques (confocal imaging and TIRF microscopy) as alternative readout techniques  
313 to be used in combination with nanofluidics (**Supplementary Figure 4 and 5**). This gives laboratories guidance  
314 on how to use nano-trapping devices with their already available fluorescence microscopy equipment according  
315 to their needs and research applications. This highlights the versatility of the applications that can be envisaged  
316 with our nanofluidic device in conjunction with different optical modalities. We anticipate that the cost-effective  
317 and easy approach for fabrication of nanofluidic devices has the potential to find broad applicability in various  
318 applications in the nanobiotechnologies, biophysics, and clinical diagnostics.

319

320 Similar nanofluidic devices were previously established by Krishnan et al. for the geometry-induced electrostatic  
321 trapping of nano-colloids[18], where iSCAT provided a label-free readout method of gold nanoparticle and  
322 liposome residence times in the nanoconfinement. The silica-based devices were fabricated using RIE etching and  
323 involved several clean room fabrication steps - therefore are not easily prototyped by biological laboratories with  
324 limited access to nanofabrication facilities. An important step to make this technology more available to the  
325 research community was achieved by Gerspach et al. [42] who moulded electrostatic trapping devices in PDMS  
326 and measured the residence time of highly charged gold nanoparticles of 60 nm, 80 nm and 100 nm diameter in  
327 nano-pockets. Their experiments showed that confinement is highly dependent of the size ratio between the particle  
328 and the trap, which underlines the importance of flexible fabrication schemes that can adapt to the application  
329 accordingly.

330

331 By contrast, the method demonstrated in the present paper shows the advantage of a stationary chip design without  
332 external machinery to study a variety of biological specimen from colloids to oligomers and DNA molecules in  
333 confined space, without permanently immobilizing or perturbing these. EBL and RIE as the golden standards for  
334 the fabrication of silica trapping devices have higher lateral resolution than 2PL, but 2PL allows a more versatile  
335 integration of complex nanofluidic and nano-trapping geometries into microfluidic device platforms in the sub-  
336 micron regime.

337

338 Taken together, in this paper, we give a cost-effective and facile approach for the fabrication of nanofluidic devices  
339 to study single molecules in solution without permanent surface immobilization using hybrid 2-photon  
340 lithography. With our approach we envisage to facilitate nanoparticle trapping technology in biological and  
341 biomedical laboratories, paving the way for the use of photon-intensive spectroscopic techniques for applications  
342 related to protein misfolding disease, cancer research, and bionanotechnology.

343

## 344 **Methods**

### 346 **Wafer preparation and development**

347  
348 SU-8 photoresist (Type 3025, Micro Resist Technology) was spin coated (Laurell technologies, WS-650) at  
349 3000 rpm onto a 3-inch silicon wafer (MicroChemicals, Prime CZ-Si, thickness 381 +/- 20  $\mu\text{m}$ , polished, p-type)  
350 to a height of 25  $\mu\text{m}$ . The SU-8 coated wafer was soft baked and treated according to the protocol of the supplier  
351 of the photoresist. Microfluidic patterns from a custom-designed film mask (Microlithography) were then  
352 projected onto the wafer and the photoresist was exposed for 30 seconds with the UV-LED setup as described in  
353 Challa et al. [43]. The wafer was post baked at 95 °C so that the interfaces between exposed and unexposed regions  
354 become visible due to their change in refractive index, which assisted in alignment of the microstructures with the  
355 2PL setup. After the nanostructures were written with 2PL and the wafer baked at 95 °C for 8 minutes. The wafer  
356 was developed using Propylene-glycol-monomethyl-ether-acetate (PGMEA) (Sigma-Aldrich) and subsequently  
357 given a second exposure with UV light for 30 seconds to make structures mechanically stable on the wafer before  
358 final rinsing of the structures with PGMEA and Isopropanol (IPA) (Sigma-Aldrich) [35]. A post-bake of 30  
359 minutes at 95 °C on a hot plate was done at the end of the development process to increase mechanical stability of  
360 the nanostructures.

### 362 **2-photon lithography**

363  
364 A custom-built 2PL setup was used to write the calibration patterns as well as the final nanofluidic master mould.  
365 A detailed description of the upright 2-photon lithography setup and its fabrication capabilities can be found in  
366 Vanderpoorten et al. [28]. Briefly, the system uses a femto-second fibre laser (Menlo System C Fiber 780 HP)  
367 modulated as the first diffraction order of an acousto-optic modulator (AA Optoelectronics). The beam is widened  
368 through a beam expander (Thorlabs, BE02-05-B) and led over a 90:10 R:T beamsplitter (BS028, Thorlabs) into a  
369 microscope objective vertically mounted above the sample. Reflected light is collected with a tube lens (Thorlabs  
370 AC 254-100-A-ML, BBAR coating A OM 31 400–700 nm,  $f = 100.0$  mm) onto a camera ( $\mu\text{Eye ML}$ , Industry  
371 camera, USB 3.0). An optical electro-mechanical shutter (Thorlabs, SHB1) is mounted in front of the camera to  
372 protect it during high power laser writing. Through an additional 30:70 (R:T) beam splitter (BS019, Thorlabs) in  
373 the camera detection arm, a white LED (Thorlabs, MCWHL5) allows non-polymerizing inspection of the sample  
374 in wide field. A 3-inch wafer coated with pre-baked SU-8 (25  $\mu\text{m}$  thickness) was immobilised on a PI Nanocube  
375 (P-611.3S, Physikalische Instrumente) mounted on two perpendicular stacked motorised linear-precision stages  
376 (M-404.2PD, Physikalische Instrumente, Ball screw, 80 mm wide, ActiveDrive). Immersion Oil (Cargille  
377 laboratories, LDF, Code 387) was added onto the SU-8 layer before bringing the oil immersion objective (Leica,  
378 63x, PL APO, 1.40 NA) manually in close proximity to the wafer surface. The oil used here showed no reaction  
379 with unpolymerised SU-8 photo resin and facilitates easy and scalable two-photon printing. Custom-written  
380 software then automatically focusses on the wafer surface, corrects for tilt and coordinates the interplay of piezo,  
381 translational stages and laser power modulation to write the intended patterns. The laser beam intensity of the  
382 writing beam was directly measured after the acousto-optic modulator using a power meter (Thorlabs, S310C,  
383 thermal power head). To prevent exposure of the resin during the focussing process, the laser power was kept  
384 below the polymerization threshold, but high enough to be detected on the system's camera. The full travel range  
385 of the Nanocube of 100  $\mu\text{m}$  x 100  $\mu\text{m}$  was used to write a calibration array of lines and dots. Then the motorized  
386 stages were used to displace the piezo scanning areas and write a new pattern (e.g., 300  $\mu\text{m}$  displacement,  
387 positional precision = 1  $\mu\text{m}$ ) with adapted parameters. The positioning repeatability of the piezo actor (Nanocube)  
388 was below 10 nm according of the manufacturer and is key for automated focussing and reliable nanofabrication.  
389 For 2-photon-writing in the microfluidic master, we used a white light LED to first place the laser focus in between  
390 the two micro-channels and then started the automated laser writing process. The system uses the autofocus  
391 function each time it adds another nanofluidic array. This allows step wise but precise addition of nanofluidic  
392 features on the wafer scale.



## 397 **Correlative scanning electron microscopy and atomic force microscopy imaging**

398  
399 After the development process of the 2-photon written calibration assay, the wafer was manually cut into smaller  
400 dimensions to allow easier sample handling. Imprints of the master wafer were taken following conventional soft  
401 lithography protocols PDMS (Sylgard 184) with 10:1 curing agent ratio. After PDMS curation, the area of interest  
402 was cut out using a surgical scalpel. The PDMS imprint was coated with 10 nm platinum (Quorum Technologies  
403 Q150T ES Turbo-Pumped Sputter Coater/Carbon Coater) and imaged using a commercial SEM (TESCAN  
404 MIRA3 FEG-SEM). The original SU-8 features were coated with a layer of 10 nm platinum as well and imaged  
405 on the same SEM in order to compare the imprinted features with the original moulds. The final nanofluidic PDMS  
406 device imprint was imaged following the same procedures and imaged on the same microscope. AFM was  
407 conducted on the calibration sample using a Park Systems NX10 AFM. According to previous findings by Cabrera  
408 et al. [44] the PDMS surface roughness can be assumed to be below 5 nm, which should therefore not influence  
409 the steric trapping behaviour significantly.

## 410 **Profilometer measurements of nano-traps**

411  
412 The 2-photon written nanofluidic master wafer was cleaned using pressurised air and placed in a profilometer  
413 (KLA Corporation, Tencor P-6) for height measurements of nano-channels and nano-traps. Using the integrated  
414 microscope of the system, the scan direction was aligned along the centre of a nano-trapping array located between  
415 the two microfluidic reservoirs. The sample was scanned at a speed of 2.00  $\mu\text{m/s}$ , with a height scan rate of 500  
416 Hz and a force of 0.5 mg applied using a 2.00  $\mu\text{m}$  (diameter) tip.

## 417 **Single-molecule confocal measurements**

418  
419  
420 Single-molecule fluorescence measurements were performed on a custom-built single-molecule confocal  
421 microscope. Nanofluidic PDMS–silica devices were secured to a motorised microscope stage (Applied Scientific  
422 Instrumentation, PZ-2000FT). The sample was excited using a 488 nm wavelength laser (Cobolt 06-MLD, 200  
423 mW diode laser, Cobolt), which was directed to the back aperture of a 60X-magnification water-immersion  
424 objective (CFI Plan Apochromat WI 60x, NA 1.2, Nikon) using a single-mode optical fibre (P3-488PM-FC-1,  
425 Thorlabs) and an achromatic fibre collimator (60FC-L-4-M100S-26, Schäfer/Kirchhoff GmbH). The laser  
426 intensity at the back aperture of the objective was adjusted to 150  $\mu\text{W}$ . The laser beam exiting the optical fibre  
427 was reflected by a dichroic mirror (Di03-R488/561, Semrock), directed to the objective and focussed into the chip  
428 to a diffraction-limited confocal spot. The motorised stage was used to position the confocal spot within the chip.  
429 The emitted light from the sample was collected through the same objective and dichroic mirror and then passed  
430 through a 30  $\mu\text{m}$  pinhole (Thorlabs) to remove any out-of-focus light. The emitted photons were filtered through  
431 a band-pass filter (FF01-520/35-25, Semrock) and then focussed onto an avalanche photodiode (APD, SPCM-14,  
432 PerkinElmer Optoelectronics) connected to a TimeHarp260 time-correlated single-photon counting unit  
433 (PicoQuant). Photon time traces were recorded using the SymPhoTime 64 software package (Picoquant) with a  
434 binning time of 1 ms.

## 435 **Preparation of labelled $\alpha$ -synuclein oligomers**

436  
437  
438 The N122C variant of  $\alpha$ -synuclein was purified into phosphate buffered saline (PBS) pH 7.4 as described  
439 previously [45], with the addition of 3 mM DTT to all buffers to prevent dimerization. Following removal of DTT  
440 from the purified monomers by a PD10 desalting column packed with Sephadex G25 matrix (GE Healthcare), the  
441 protein was incubated with a 1.5-fold molar excess of Alexa488 with a maleimide linker (ThermoFisher Scientific)  
442 (overnight, 4  $^{\circ}\text{C}$  on a rolling system). In order to remove the free dye, the mixture was subsequently subjected to  
443 size exclusion chromatography using a Superdex 200 16/600 (GE Healthcare) and eluted in PBS pH 7.4 at 20  $^{\circ}\text{C}$ .  
444 Protein fractions were pooled, and Alexa488 labelled  $\alpha$ -synuclein concentration estimated by dye absorbance,  
445 assuming 1:1 dye:protein stoichiometry (72 000 L/mol cm at 495 nm). Stable  $\alpha$ -synuclein oligomers were formed  
446 from Alexa488 labelled monomers, as previously described [46]. Briefly, monomeric  $\alpha$ -synuclein was lyophilised  
447 in Milli-Q water and resuspended in PBS pH 7.4 at a concentration of 12 mg/m. Following incubation (37  $^{\circ}\text{C}$ , 20-  
448 24 h), the samples were ultracentrifuged (1h, 288'000 x g) (Optima TLX Ultracentrifuge, Beckman Coulter, TLA-

450 120.2 Beckman rotor) to remove large aggregates. Monomeric protein was removed by multiple filtration steps  
451 through 100 kDa concentrating filters. The oligomer concentration was estimated based on the dye absorbance  
452 (72'000 L/mol cm at 495 nm).

453

#### 454 **Sample and device preparation for single molecule experiments**

455

456 100 nm and 40 nm fluorescent colloids (FluoSpheres) were purchased from ThermoFisher.  $\alpha$ -synuclein oligomers  
457 were prepared as described above. Double-stranded DNA was prepared from two single-stranded DNA  
458 oligonucleotides by thermal annealing. Oligonucleotides were synthesized and labelled by Biomers. The  
459 sequences were: 5'-GCC TTA TTT TCA CTC TTT CCT TTC TTC TTC TCT CTT TTT TTC CCG-3' (top strand)  
460 and 5'-CGG GAA AAA AAG AGA GAA GAA GAA AGG AAA GAG TGA AAA TAA GGC-3' (bottom strand);  
461 the top strand was labelled with Atto488 at the thymidine at position 7, shown in bold type.

462

463 Micro-/nanofluidic devices were moulded from the fabricated SU-8 master via soft lithography using PDMS  
464 (Sylgard 184; with 10:1 curing agent ratio). After baking, inlets were added using surgical punchers and plasma  
465 bonded to coverslip glasses (Menzel coverslips, Grade H1.5). The surface of the coverslips and the PDMS were  
466 plasma treated, and afterwards manually pressed on top of each other. Devices were used directly after the plasma  
467 bonding step to use their remaining surface hydrophilicity for easier filling of the devices. Before the experiments,  
468 the chips were filled by pipetting equal amounts of diluted sample solutions into the inlet areas and equilibrated  
469 for 20 minutes.

470

#### 471 **Bibliography**

472

- 473 [1] D. Gao *et al.*, “Optical manipulation from the microscale to the nanoscale: fundamentals, advances and  
474 prospects,” *Light Sci. Appl.*, vol. 6, no. 9, pp. e17039–e17039, 2017, doi: 10.1038/lsa.2017.39.
- 475 [2] Q. Wang, R. H. Goldsmith, Y. Jiang, S. D. Bockenhauer, and W. E. Moerner, “Probing single biomolecules  
476 in solution using the anti-brownian electrokinetic (ABEL) trap,” *Acc. Chem. Res.*, vol. 45, no. 11, pp. 1955–  
477 1964, Nov. 2012, doi: 10.1021/ar200304t.
- 478 [3] T. Huang and C.-X. Deng, “Current Progresses of Exosomes as Cancer Diagnostic and Prognostic  
479 Biomarkers,” *Int. J. Biol. Sci.*, vol. 15, no. 1, pp. 1–11, Jan. 2019, doi: 10.7150/ijbs.27796.
- 480 [4] A. H. Squires, P. D. Dahlberg, H. Liu, N. C. M. Magdaong, R. E. Blankenship, and W. E. Moerner, “Single-  
481 molecule trapping and spectroscopy reveals photophysical heterogeneity of phycobilisomes quenched by  
482 Orange Carotenoid Protein,” *Nat. Commun.*, vol. 10, no. 1, pp. 1–12, Dec. 2019, doi: 10.1038/s41467-019-  
483 09084-2.
- 484 [5] A. H. Squires, A. A. Lavania, P. D. Dahlberg, and W. E. Moerner, “Interferometric Scattering Enables  
485 Fluorescence-Free Electrokinetic Trapping of Single Nanoparticles in Free Solution,” *Nano Lett.*, vol. 19,  
486 no. 6, pp. 4112–4117, Jun. 2019, doi: 10.1021/acs.nanolett.9b01514.
- 487 [6] A. E. Cohen and W. E. Moerner, “Method for trapping and manipulating nanoscale objects in solution,”  
488 *Appl. Phys. Lett.*, vol. 86, no. 9, pp. 1–3, Feb. 2005, doi: 10.1063/1.1872220.
- 489 [7] R. Roy, S. Hohng, and T. Ha, “A practical guide to single-molecule FRET,” *Nature Methods*, vol. 5, no. 6.  
490 NIH Public Access, pp. 507–516, Jun. 2008, doi: 10.1038/nmeth.1208.
- 491 [8] L. Grasso *et al.*, “Molecular screening of cancer-derived exosomes by surface plasmon resonance  
492 spectroscopy,” *Anal. Bioanal. Chem.*, vol. 407, no. 18, pp. 5425–5432, Jul. 2015, doi: 10.1007/s00216-  
493 015-8711-5.
- 494 [9] U. B. Choi, K. R. Weninger, and M. E. Bowen, “Immobilization of proteins for single-molecule  
495 fluorescence resonance energy transfer measurements of conformation and dynamics,” *Methods Mol. Biol.*,  
496 vol. 896, pp. 3–20, 2012, doi: 10.1007/978-1-4614-3704-8\_1.
- 497 [10] H. Y. Yang and W. E. Moerner, “Resolving Mixtures in Solution by Single-Molecule Rotational  
498 Diffusivity,” *Nano Lett.*, vol. 18, no. 8, pp. 5279–5287, Aug. 2018, doi: 10.1021/acs.nanolett.8b02280.

- 499 [11] M. Tanyeri and C. M. Schroeder, “Manipulation and Confinement of Single Particles Using Fluid Flow,”  
500 *Nano Lett.*, vol. 13, no. 6, pp. 2357–2364, Jun. 2013, doi: 10.1021/nl4008437.
- 501 [12] C. Bradac, “Nanoscale Optical Trapping: A Review,” *Adv. Opt. Mater.*, vol. 6, no. 12, p. 1800005, Jun.  
502 2018, doi: 10.1002/adom.201800005.
- 503 [13] C. Chen *et al.*, “Enhanced optical trapping and arrangement of nano-objects in a plasmonic nanocavity,”  
504 *Nano Lett.*, vol. 12, no. 1, pp. 125–132, Jan. 2012, doi: 10.1021/nl2031458.
- 505 [14] J. E. Melzer and E. McLeod, “Fundamental Limits of Optical Tweezer Nanoparticle Manipulation Speeds,”  
506 *ACS Nano*, vol. 12, no. 3, pp. 2440–2447, Mar. 2018, doi: 10.1021/acsnano.7b07914.
- 507 [15] E. H. Hill, J. Li, L. Lin, Y. Liu, and Y. Zheng, “Opto-Thermophoretic Attraction, Trapping, and Dynamic  
508 Manipulation of Lipid Vesicles,” *Langmuir*, vol. 34, no. 44, pp. 13252–13262, Nov. 2018, doi:  
509 10.1021/acs.langmuir.8b01979.
- 510 [16] J. Chen *et al.*, “Thermal gradient induced tweezers for the manipulation of particles and cells.,” *Sci. Rep.*,  
511 vol. 6, p. 35814, Nov. 2016, doi: 10.1038/srep35814.
- 512 [17] K. Wang, E. Schonbrun, P. Steinvurzel, and K. B. Crozier, “Trapping and rotating nanoparticles using a  
513 plasmonic nano-tweezer with an integrated heat sink,” *Nat. Commun.*, vol. 2, no. 1, p. 469, 2011, doi:  
514 10.1038/ncomms1480.
- 515 [18] M. Krishnan, N. Mojarad, P. Kukura, and V. Sandoghdar, “Geometry-induced electrostatic trapping of  
516 nanometric objects in a fluid,” *Nature*, vol. 467, no. 7316, pp. 692–695, 2010, doi: 10.1038/nature09404.
- 517 [19] M. Krishnan, “Electrostatic free energy for a confined nanoscale object in a fluid,” *J. Chem. Phys.*, vol.  
518 138, no. 11, p. 114906, Mar. 2013, doi: 10.1063/1.4795087.
- 519 [20] M. I. Bernalova, S. Mahanta, and M. Krishnan, “Single-molecule trapping and measurement in solution,”  
520 *Curr. Opin. Chem. Biol.*, vol. 51, pp. 113–121, 2019, doi: 10.1016/j.cbpa.2019.05.013.
- 521 [21] N. Mojarad and M. Krishnan, “Measuring the size and charge of single nanoscale objects in solution using  
522 an electrostatic fluidic trap,” *Nat. Nanotechnol.*, vol. 7, no. 7, pp. 448–452, 2012, doi:  
523 10.1038/nnano.2012.99.
- 524 [22] F. Ruggeri and M. Krishnan, “Entropic Trapping of a Singly Charged Molecule in Solution,” *Nano Lett.*,  
525 vol. 18, no. 6, pp. 3773–3779, Jun. 2018, doi: 10.1021/acs.nanolett.8b01011.
- 526 [23] F. Ruggeri *et al.*, “Single-molecule electrometry,” *Nat. Nanotechnol.*, vol. 12, no. 5, pp. 488–495, 2017,  
527 doi: 10.1038/nnano.2017.26.
- 528 [24] C. Duan, W. Wang, and Q. Xie, “Review article: Fabrication of nanofluidic devices,” *Biomicrofluidics*,  
529 vol. 7, no. 2, p. 26501, Mar. 2013, doi: 10.1063/1.4794973.
- 530 [25] L. D. Menard and J. M. Ramsey, “Electrokinetically-driven transport of DNA through focused ion beam  
531 milled nanofluidic channels.,” *Anal. Chem.*, vol. 85, no. 2, pp. 1146–1153, Jan. 2013, doi:  
532 10.1021/ac303074f.
- 533 [26] G. Bruno *et al.*, “Unexpected behaviors in molecular transport through size-controlled nanochannels down  
534 to the ultra-nanoscale,” *Nat. Commun.*, vol. 9, no. 1, pp. 1–10, 2018, doi: 10.1038/s41467-018-04133-8.
- 535 [27] S. Maruo, O. Nakamura, and S. Kawata, “Three-dimensional microfabrication with two-photon-absorbed  
536 photopolymerization,” *Opt. Lett.*, vol. 22, no. 2, p. 132, Jan. 1997, doi: 10.1364/OL.22.000132.
- 537 [28] O. Vanderpoorten *et al.*, “Scalable integration of nano-, and microfluidics with hybrid two-photon  
538 lithography,” *Microsystems Nanoeng.*, vol. 5, no. 1, pp. 1–9, Dec. 2019, doi: 10.1038/s41378-019-0080-3.
- 539 [29] C. Barner-Kowollik *et al.*, “3D Laser Micro- and Nanoprinting: Challenges for Chemistry,” *Angewandte  
540 Chemie - International Edition*, vol. 56, no. 50, Wiley-VCH Verlag, pp. 15828–15845, Dec. 11, 2017, doi:  
541 10.1002/anie.201704695.
- 542 [30] X. Zhou, Y. Hou, and J. Lin, “A review on the processing accuracy of two-photon polymerization,” *AIP*



- 543 *Adv.*, vol. 5, no. 3, p. 30701, Mar. 2015, doi: 10.1063/1.4916886.
- 544 [31] M. Oellers, F. Lucklum, and M. J. Vellekoop, “On-chip mixing of liquids with swap structures written by  
545 two-photon polymerization,” *Microfluid. Nanofluidics*, vol. 24, no. 1, p. 4, Jan. 2020, doi: 10.1007/s10404-  
546 019-2309-8.
- 547 [32] K. Venkatakrishnan, S. Jariwala, and B. Tan, “Maskless fabrication of nano-fluidic channels by two-photon  
548 absorption (TPA) polymerization of SU-8 on glass substrate,” *Opt. Express*, vol. 17, no. 4, p. 2756, Feb.  
549 2009, doi: 10.1364/oe.17.002756.
- 550 [33] K. Sugioka *et al.*, “Femtosecond laser 3D micromachining: A powerful tool for the fabrication of  
551 microfluidic, optofluidic, and electrofluidic devices based on glass,” *Lab on a Chip*, vol. 14, no. 18. Royal  
552 Society of Chemistry, pp. 3447–3458, Sep. 21, 2014, doi: 10.1039/c4lc00548a.
- 553 [34] Y. Xia and G. M. Whitesides, “Soft lithography,” *Annu. Rev. Mater. Sci.*, vol. 28, 1998, doi:  
554 10.1146/annurev.matsci.28.1.153.
- 555 [35] J. Purto, A. Verch, P. Rogin, and R. Hensel, “Improved development procedure to enhance the stability  
556 of microstructures created by two-photon polymerization,” *Microelectron. Eng.*, vol. 194, pp. 45–50, Jul.  
557 2018, doi: 10.1016/j.mee.2018.03.009.
- 558 [36] G. M. Whitesides, “The origins and the future of microfluidics,” *Nature*, vol. 442, no. 7101. Nature  
559 Publishing Group, pp. 368–373, Jul. 27, 2006, doi: 10.1038/nature05058.
- 560 [37] A. M. Streets and Y. Huang, “Microfluidics for biological measurements with single-molecule resolution,”  
561 *Current Opinion in Biotechnology*, vol. 25. Elsevier Current Trends, pp. 69–77, Feb. 01, 2014, doi:  
562 10.1016/j.copbio.2013.08.013.
- 563 [38] R. M. Guijt and A. Manz, “Miniaturised total chemical-analysis systems (MTAS) that periodically convert  
564 chemical into electronic information,” *Sensors and Actuators, B: Chemical*, vol. 273. Elsevier B.V., pp.  
565 1334–1345, Nov. 10, 2018, doi: 10.1016/j.snb.2018.06.054.
- 566 [39] R. B. Schoch, J. Han, and P. Renaud, “Transport phenomena in nanofluidics,” *Rev. Mod. Phys.*, vol. 80,  
567 2008, doi: 10.1103/RevModPhys.80.839.
- 568 [40] C. E. Castro *et al.*, “A primer to scaffolded DNA origami,” *Nat. Methods*, vol. 8, no. 3, pp. 221–229, Mar.  
569 2011, doi: 10.1038/nmeth.1570.
- 570 [41] S. Guilbaud, L. Salomé, N. Destainville, M. Manghi, and C. Tardin, “Dependence of DNA Persistence  
571 Length on Ionic Strength and Ion Type,” *Phys. Rev. Lett.*, vol. 122, no. 2, p. 028102, Jan. 2019, doi:  
572 10.1103/PhysRevLett.122.028102.
- 573 [42] M. A. Gerspach, N. Mojarad, D. Sharma, T. Pfohl, and Y. Ekinici, “Soft electrostatic trapping in  
574 nanofluidics,” *Microsystems Nanoeng.*, vol. 3, no. 1, p. 17051, 2017, doi: 10.1038/micronano.2017.51.
- 575 [43] P. K. Challa, T. Kartanas, J. Charmet, and T. P. J. Knowles, “Microfluidic devices fabricated using fast  
576 wafer-scale LED-lithography patterning,” *Biomicrofluidics*, vol. 11, 2017, doi: 10.1063/1.4976690.
- 577 [44] J. N. Cabrera *et al.*, “Increased Surface Roughness in Polydimethylsiloxane Films by Physical and  
578 Chemical Methods,” *Polymers (Basel)*, vol. 9, no. 8, p. 331, Aug. 2017, doi: 10.3390/POLYM9080331.
- 579 [45] W. Hoyer, T. Antony, D. Cherny, G. Heim, T. M. Jovin, and V. Subramaniam, “Dependence of  $\alpha$ -synuclein  
580 aggregate morphology on solution conditions,” *J. Mol. Biol.*, vol. 322, no. 2, pp. 383–393, Sep. 2002, doi:  
581 10.1016/S0022-2836(02)00775-1.
- 582 [46] S. W. Chen *et al.*, “Structural characterization of toxic oligomers that are kinetically trapped during  $\alpha$ -  
583 synuclein fibril formation,” *Proc. Natl. Acad. Sci. U. S. A.*, vol. 112, no. 16, pp. E1994–E2003, Apr. 2015,  
584 doi: 10.1073/pnas.1421204112.

585

586

587 **Acknowledgements**

588

589 The work was funded by the Horizon 2020 programme through 766972-FET-OPEN-NANOPHLOW (TPJK). The  
590 research leading to these results has further received funding from the European Research Council under the  
591 European Union's Horizon 2020 Framework Programme through the Marie Skłodowska-Curie grant  
592 MicroSPARK (agreement n° 841466; GK), the Herchel Smith Funds (GK), and the Wolfson College Junior  
593 Research Fellowship (G.K.). This work was also supported by the Engineering and Physical Sciences Research  
594 Council [grant numbers EP/L015889/1]. The authors would also like to thank the NanoDTC for additional funding  
595 and the Maxwell Community for scientific support.

596

597 **Author contributions statement**

598

599 OV and ANB fabricated nanofluidic masters and chips using two-photon lithography. ANB characterised the  
600 calibration assays using SEM and AFM. OV conducted profilometer measurements on nanofluidic master wafer.  
601 GK built the confocal burst detection setup and conducted the fluorescence burst experiments of colloids,  
602 oligomers, and DNA in nano-trap devices and micro-channels. OV and ANB imaged trapping events of colloidal  
603 particles using confocal microscopy. PKC, ZT, ANB and OV conducted TIRF microscopy measurements of  
604 colloidal particles. PKC and ZT also conducted trapping experiments using conventional UV-lithography in an  
605 early stage of the project, which helped form the content of this paper. RJ contributed with data analysis and wrote  
606 software for the residence time measurements of the fluorescence burst data. QP improved the control software of  
607 the two-photon system which allowed initial test runs and to conduct the fabrication assay. CX prepared and  
608 purified oligomer samples used for all the experiments. OV, GK, and ANB wrote the paper. All authors provided  
609 input into the manuscript.
